# Supplementary material
Source: MDPI journal article supplement (https://www.mdpi.com/2076-3298/11/2/34)
Supplement: s1 [file s1]

Article

# Concentrations of Potentially Toxic Elements in Topsoils of Urban Agricultural Areas of Rome

Monica Shree Chandramohan <sup>1,2,3,4</sup>, Isabel Martinho da Silva <sup>2,3</sup>  
and Joaquim Esteves da Silva <sup>4,\*</sup>

<sup>1</sup> Department for Innovation in Biological, Agro-Food and Forest Systems (DIBAF), University of Tuscia, Via San C. De Lellis, snc, 01100 Viterbo, Italy; monicashree@unitus.it

<sup>2</sup> BIOPOLIS—CIBIO, Research Centre in Biodiversity and Genetic Resources, Campus de Vairão, Universidade do Porto, 4485-661 Vairão, Portugal; isabelsilva@fc.up.pt

<sup>3</sup> Department of Geosciences, Environment and Territorial Planning, Faculty of Sciences, University of Porto, Rua do Campo Alegre s/n, 4169-007 Porto, Portugal

<sup>4</sup> Chemistry Research Unit (CIQUP), Institute of Molecular Sciences (IMS), Department of Geosciences, Environment and Territorial Planning, Faculty of Sciences, University of Porto, Rua do Campo Alegre s/n, 4169-007 Porto, Portugal

\* Correspondence: jcsilva@fc.up.pt

## Supplemental Information

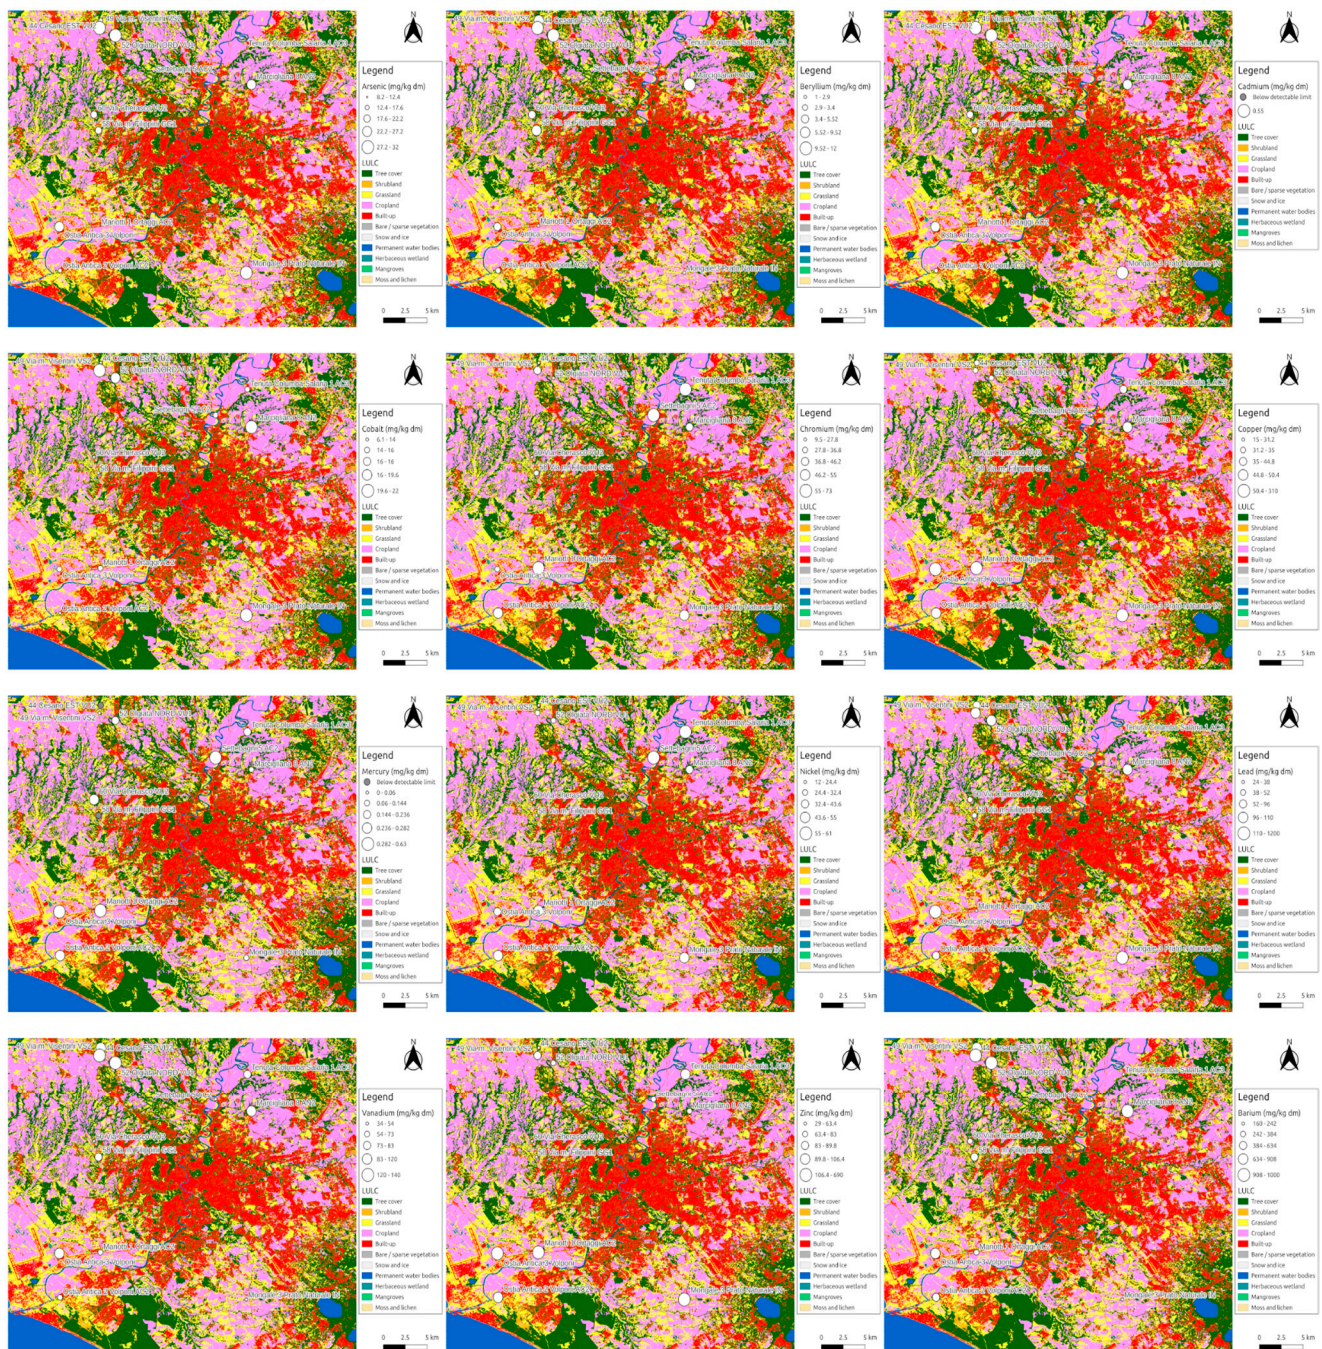

**Figure S1: Map showing spatial distribution of metal content with the Land Use Land Cover from ESA world cover at the background.**



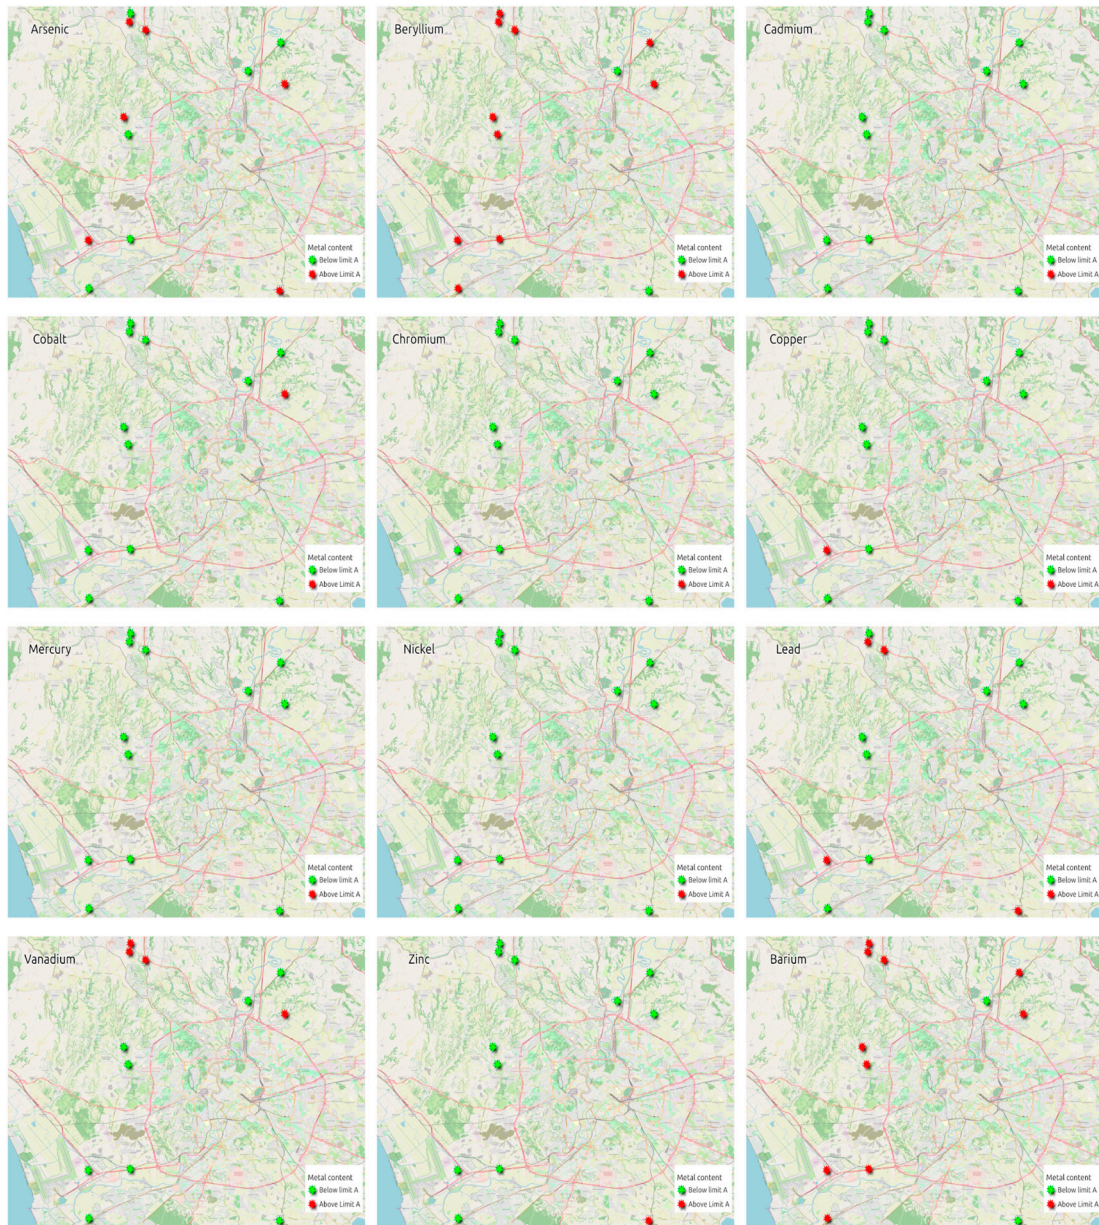

**Figure S2: Map showing the locations having PTE content exceeding or within the limit for agriculture, as there was no limit for Barium in Italy, the limit of Portugal is used.**

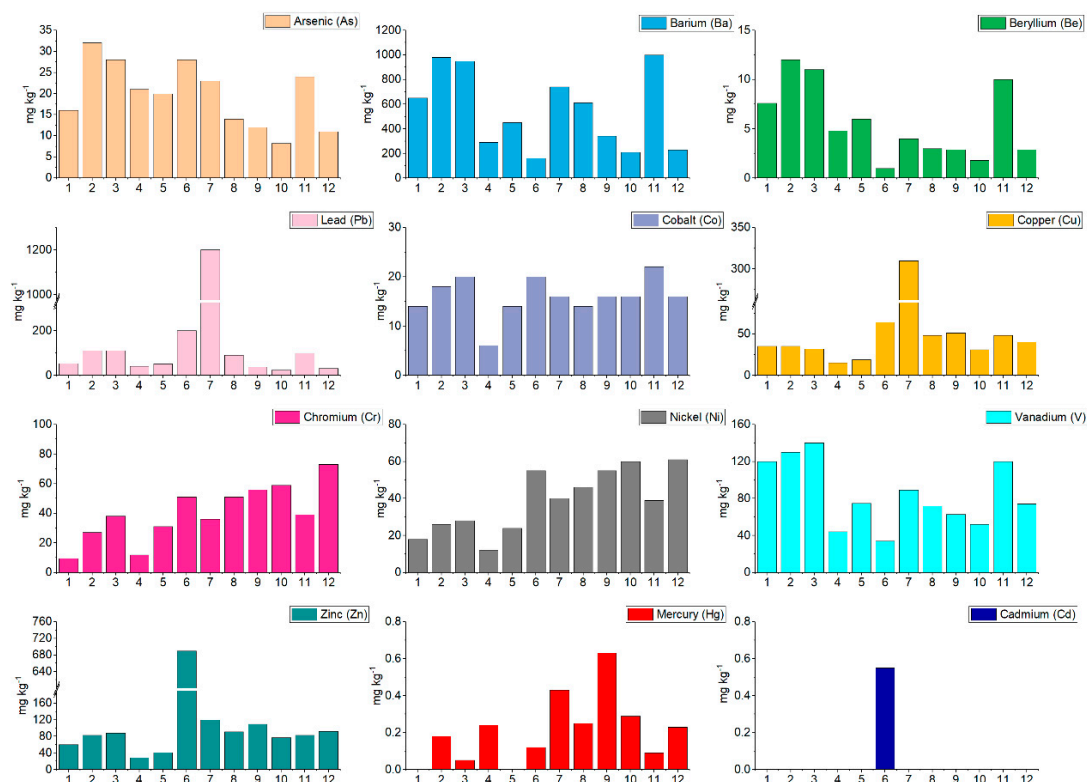

**Figure S3: PTE content among the 12 sampling locations in Rome, Italy.**

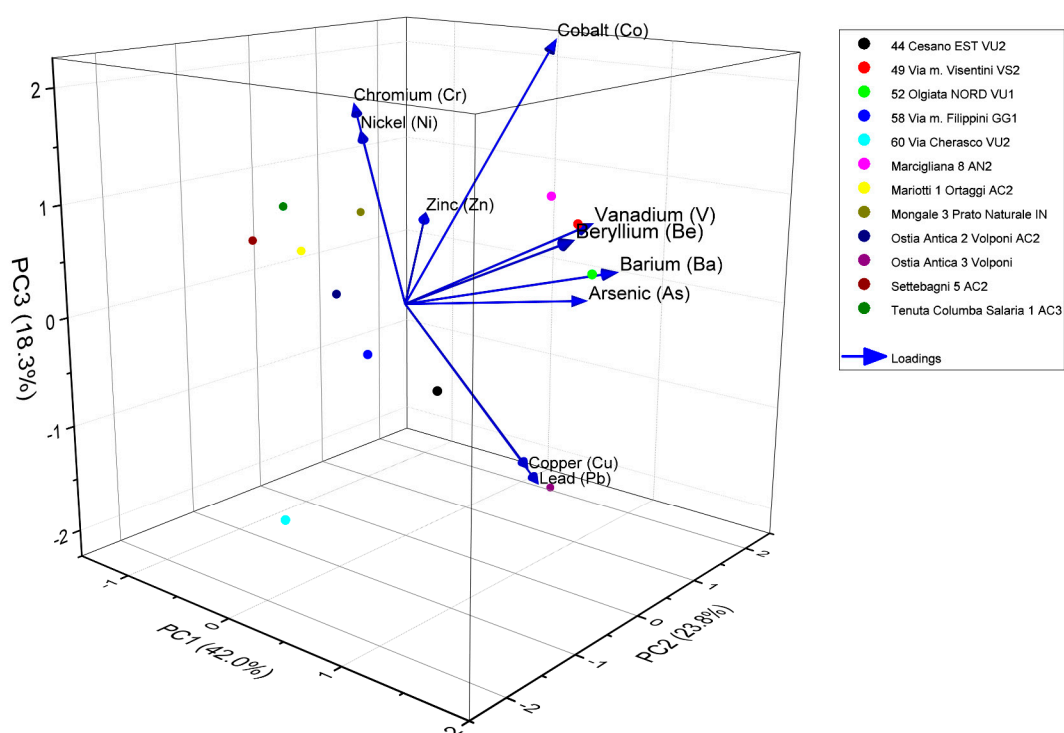

**Figure S4: 3-Dimensional Principal Component Analysis (PCA) Biplot for sampling locations and PTEs showing PC1, PC2 and PC3 components.**
